1 **Identification of diverse antibiotic resistant bacteria in agricultural soil with H<sub>2</sub><sup>18</sup>O stable isotope**  
2 **probing and metagenomics**

3

4 Marcela Hernández<sup>a,b</sup>, Shamik Roy<sup>b</sup>, C. William Keevil<sup>a</sup>, Marc G. Dumont<sup>a\*</sup>

5

6 <sup>a</sup> School of Biological Sciences, University of Southampton, Southampton SO17 1BJ, UK

7 <sup>b</sup> School of Biological Sciences, University of East Anglia, Norwich NR4 7TJ, UK

8

9

10 *Running title: Multi-drug resistant bacteria in agricultural soil*

11

12

13

14

15

16

17 \*Corresponding author:

18 Marc G. Dumont, University of Southampton, Life Sciences Building 85, Highfield Campus,

19 Southampton SO17 1BJ, UK, [m.g.dumont@soton.ac.uk](mailto:m.g.dumont@soton.ac.uk)

20

21

22

23

24

25

26

27 **Abstract**

28 **Background:** In this study, we aimed to identify bacteria able to grow in the presence of several  
29 antibiotics including the ultra-broad-spectrum antibiotic meropenem in a British agricultural soil, by  
30 combining DNA stable isotope probing (SIP) with high throughput sequencing. Soil was incubated  
31 with cefotaxime, meropenem, ciprofloxacin and trimethoprim in  $^{18}\text{O}$ -water. Metagenomes and the  
32 V4 region of the 16S rRNA gene from the labelled “heavy” and the unlabelled “light” SIP fractions  
33 were sequenced.

34 **Results:** After incubations, an increase of the 16S rRNA copy numbers in the “heavy” fractions of the  
35 treatments with  $^{18}\text{O}$ -water compared with their controls was detected. The treatments resulted in  
36 differences in the community composition of bacteria. Members of the phyla Acidobacteriota  
37 (formally Acidobacteria) are highly abundant after two days of incubation with antibiotics. Several  
38 Pseudomonadota (formally Proteobacteria) including *Stenotrophomonas* were prominent after four  
39 days of incubation. Furthermore, a metagenome-assembled genome (MAG-1) from the genus  
40 *Stenotrophomonas* (90.7% complete) was retrieved from the heavy fraction. Finally, 11 antimicrobial  
41 resistance genes (ARGs) were identified in the unbinned-assembled heavy fractions, and 10 ARGs  
42 were identified in MAG-1. On the other hand, only two ARGs from the unbinned-assembled light  
43 fractions were identified.

44 **Conclusions:** The results indicate that both non-pathogenic soil- dwelling bacteria as well as  
45 potential clinical pathogens are present in this agricultural soil, and several ARGs were identified  
46 from the labelled communities, but it is still unclear if horizontal gene transfer between these groups  
47 can occur.

48  
49 **Keywords:** antimicrobial resistant bacteria, soil, antibiotics, pathogens, DNA stable isotope probing,  
50 high-throughput sequencing, metagenomics.

51

52

## 53 Introduction

54 Soil represents a natural reservoir of antimicrobial resistance genes (ARG) that has originated as a  
55 defence mechanism for the microbes to deter antimicrobial products secreted by competing  
56 microbes in the same niche. However, the abuse and/or misuse of antibiotics among humans to  
57 treat diseases, and livestock production systems to increase yield has initiated the alteration of  
58 natural antimicrobial resistance (AMR) and subsequent spread across all terrestrial ecosystems [1].  
59 Indeed, no soil environment can be now considered pristine as the ARGs are present in garden soils  
60 [2], agricultural soils [3], forests [4], grasslands [5], and even Antarctic soils [6]. So much so that soil  
61 can harbour up to 32% of the overall ARG diversity [7]. In addition, a previous study has reported the  
62 importance of low abundance antibiotic-resistant microbes in soil-plant systems for the spread of  
63 AMR [8].

64 Transmission of AMR back to humans through soil-microbe-animal-plant nexus endangers  
65 public health, since the spread of AMR could push us to the pre-antibiotic era. We now know what  
66 can happen to AMR in soils due to rise in antibiotic diversity and abundance in the environment but  
67 how AMR will spread in soil remains to be seen. In other words, the drivers, or mechanisms of the  
68 inevitable spread of AMR in soils when challenged with antibiotics remains to be determined.  
69 Deciphering this knowledge gap is crucial for us to develop strategies to alleviate the spread of AMR  
70 in terrestrial ecosystems.

71 It has been hypothesised that the spread of AMR in soil is primarily driven by two non-  
72 independent processes that can operate in tandem to alter the antibiotic resistome in soil [1,9]. One  
73 process is horizontal gene transfer (HGT) of antimicrobial resistance genes (ARG) between microbial  
74 community members. Secondly is the directional selection of antibiotic resistant microbes that can  
75 grow in the presence of antibiotics. This could be either due to incorporation of microbiomes  
76 derived from anthropogenic sources (e.g., organic fertiliser), or selection and proliferation of  
77 naturally resistant microbiota. We are now beginning to understand how HGT can facilitate the  
78 spread of AMR in pristine environments [6,10]. For instance, the *bla*<sub>NDM-1</sub> gene that confers

79 resistance to carbapenem (last resort antibiotic) is now ubiquitous due to successive and distinct  
80 HGT events [11,12]. On the other hand, there is limited knowledge about the community  
81 composition of the microbiome that can resist antibiotic in soil. One of the main reasons could be  
82 the large abundance of extracellular DNA (eDNA) in soil, which cannot distinguish active antibiotic  
83 resistant microbes from dead/dormant antibiotic sensitive microbes [13,14]. This could be the  
84 reason why studies have reported contradictory results of no change in microbiomes to complete  
85 change upon antibiotic addition [5,15].

86         Agricultural ecosystems represent 38% of the Earth's ice-free terrestrial surface — the  
87 largest use of land on the planet [16]. Sustainable agricultural practice envisions the widespread  
88 adoption of organic fertilisers instead of chemical fertilisers as a source of nutrients to maintain or  
89 increase crop yield [17]. This is essential to achieve climate-change goals and concomitantly meet  
90 the dietary demands of 9 billion people by 2050. However, the build-up of antibiotic concentrations  
91 and ARG abundance in environmentally sustainable organic fertilisers, such as livestock manure and  
92 sewage sludge, permeates agricultural soils to spread AMR by altering the microbiome [1,9,13,18].  
93 Since AMR microbes are one of the major determinants of AMR spread, it is therefore crucial for us  
94 to identify the active fraction of the soil microbial community that can grow in the presence of  
95 antibiotics.

96         Stable isotope probing (SIP) with [ $^{18}\text{O}$ ]-water presents a unique approach to identify the  
97 active AMR microbes [19,20]. SIP is a cultivation-independent approach that requires the addition of  
98 stable-isotope-enriched substrates (e.g.,  $^{13}\text{C}$ -methane,  $^{18}\text{O}$ -water) to environmental samples  
99 followed by analyses of labelled DNA or RNA [20]. SIP techniques can target phylogenetically  
100 constrained metabolic processes (e.g., ethane oxidation) where from a diverse pool of active  
101 microbial community only those microbial guilds that can assimilate and subsequently incorporate  
102 the labelled substrate into their biomolecules such as DNA and RNA are identified. In contrast, SIP-  
103  $\text{H}_2^{18}\text{O}$  as a substrate can potentially label all metabolically active or growing microbes since water is  
104 a prerequisite for growth and cellular maintenance [19,21]. Here, fast growing microbes are labelled

105 first, but eventually all active microbes are expected to contain isotope-enriched DNA. Additionally,  
106  $^{18}\text{O}$  has two more neutrons than naturally abundant  $^{16}\text{O}$ , whereas  $^2\text{H}$ ,  $^{13}\text{C}$  and  $^{15}\text{N}$  has only one  
107 additional neutron compared to their naturally abundant counterparts ( $^1\text{H}$ ,  $^{12}\text{C}$  and  $^{14}\text{N}$ ). This can  
108 potentially increase the degree of physical separation of labelled  $^{18}\text{O}$ -DNA from unlabelled DNA  
109 during isopycnic centrifugation in SIP. As a result, the SIP- $\text{H}_2^{18}\text{O}$  has been used as a robust method to  
110 identify the active microbes in a multitude of treatment set-ups such as nutrient addition to soil [22],  
111 soil rewetting [21,23], and soil warming [24].

112 In this study we combine antibiotic selection and SIP- $\text{H}_2^{18}\text{O}$  to elucidate active and growing  
113 microbial communities in an agricultural soil. Antibiotic selection or continuous presence of  
114 antibiotics in the experiment will select only AMR microbes to grow, and simultaneously kill or  
115 inhibit the growth of sensitive microbes. We also use agricultural soil with no history of antibiotic  
116 addition either directly, or indirectly via organic fertilisers. This was done to reduce the bias in  
117 identification that can be introduced from long-term exposure of microbes to anthropogenic derived  
118 antibiotics as it may already have selected for a resistant microbial community with no difference  
119 between the antibiotic challenged and unchallenged communities. Our objectives for this study  
120 were to investigate whether microbes in agricultural soil with no-antibiotic history can grow if  
121 challenged with antibiotic; secondly, if they are present to identify the microbes and the metabolic  
122 machinery and/or AMR genes that confer resistance. We hypothesise that the addition of antibiotics  
123 to agricultural soils in the presence of  $\text{H}_2^{18}\text{O}$  will unravel the identity of antibiotic resistant microbes  
124 and this will help to understand the drivers of AMR spread.

125

## 126 **Results**

127 To evaluate whether microbes in an agricultural soil with no-antibiotic history can grow if challenged  
128 with antibiotic, agricultural soils were incubated with an antibiotic cocktail of meropenem (mem),  
129 cefotaxime (ctx), ciprofloxacin (cip) and trimethoprim (tmp), along with  $\text{H}_2^{18}\text{O}$  or natural isotope  
130 abundance water (referred to as  $\text{H}_2^{16}\text{O}$ ). Here we report the results after 4-days of incubation with

131 antibiotic addition at 0 and 48 hr time-points. A total of 18 CsCl gradient fractions were collected  
132 following ultracentrifugation and the 16S rRNA gene copy numbers (bacterial abundance) were  
133 analysed for each experimental setup.

134 Incubation with  $H_2^{18}O$  increased the overall buoyant density of the extracted DNA as  
135 compared to the  $H_2^{16}O$  controls (Figure 1).  $^{18}O$ -labelled DNA (heavy fractions) resided in fractions  
136 with densities  $1.73 \text{ g ml}^{-1}$  and above, whereas unlabelled DNA (light fractions) resided in fractions  
137 with densities  $1.729 \text{ g ml}^{-1}$  and lower (Figure 1). This indicates that bacteria were actively  
138 incorporating  $^{18}O$  into their DNA. Here, the heavy fraction indicates active or growing microbes,  
139 whereas the light fraction indicates dormant or dead microbes.

140 After 4-days of incubation with  $H_2^{18}O$  there was a large abundance of bacterial 16S rRNA  
141 gene copies in the heavy fraction as compared to the heavy fraction of samples incubated with  $H_2^{16}O$   
142 (Figure 1). This was the case for both the antibiotic treatment and no-antibiotic controls suggesting  
143 there was substantial bacterial growth in the presence of antibiotics.

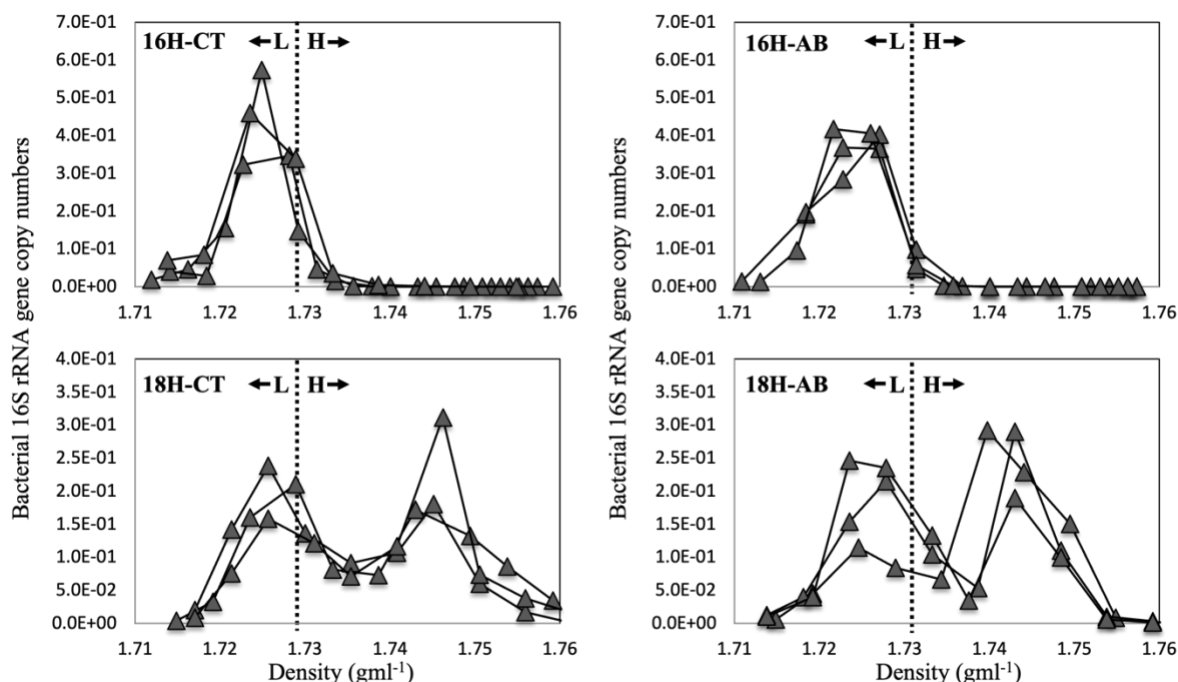

144  
145  
146 **Figure 1.** Abundance of bacterial 16S rRNA genes in CsCl density gradients after  $^{16}O$ -/ $^{18}O$ - $H_2O$   
147 incubation. Vertical dotted lines demarcate the heavy (H) fractions from light (L) fractions. Each line  
148 represents a sample. 16H-CT: soils incubated in the presence of natural isotope abundance water

149 (H<sub>2</sub><sup>16</sup>O) without antibiotics (control); 16H-AB: incubation in the presence of H<sub>2</sub><sup>16</sup>O and antibiotics; 18H-  
150 CT: incubation in the presence of H<sub>2</sub><sup>18</sup>O without antibiotics (control); 18H-AB: incubation in the  
151 presence of H<sub>2</sub><sup>18</sup>O and antibiotics.

152

153 Species richness was significantly lower in the heavy fractions (2278 ± 142, mean ± 95% confidence  
154 interval) than light fractions (5025 ± 99) for antibiotics (AB) treated soil (p<0.001). Similarly for CT  
155 treatment (i.e., control: soil without antibiotics), the species richness was significantly lower (p=0.013)  
156 in the heavy fractions (2926 ± 314) than in the light fractions (3980 ± 370). Shannon diversity (*H*) was  
157 lower (p<0.001) for heavy fractions (1.99 ± 0.36) than light fractions (6.50 ± 0.37) for AB treated soil.  
158 However, for CT, Shannon diversity (*H*) did not differ (p=0.157) between heavy fractions (4.37 ± 0.12)  
159 and light fractions (5.12 ± 0.68). Evenness (*J*) indexes were lower (p<0.001) in heavy fractions (0.42 ±  
160 0.07) than in light fractions (0.98 ± 0.01) for AB treated soil. Contrarily, for control treatments (CT),  
161 evenness (*J*) did not differ (p=0.219) between heavy fractions (0.93 ± 0.01) and light fractions (0.93 ±  
162 0.05) (Figure 2).

163         When comparing the heavy fractions of AB and CT treatments, species richness was lower  
164 (p=0.039) for heavy fractions for AB treatments (2278 ± 142) than CT treatments (2926 ± 314).  
165 Similarly, Shannon diversity was lower (p=0.003) for AB treatments (1.99 ± 0.36) than CT treatments  
166 (4.37 ± 0.12). Evenness was also lower (p=0.005) for AB treatments (0.42 ± 0.07) than CT treatments  
167 (0.93 ± 0.01) (Figure 2). Finally, the coefficient of variation (CV) for all alpha diversity indices across  
168 all the treatments ranged from 0.4% to 16.0% (Figure 2).

169

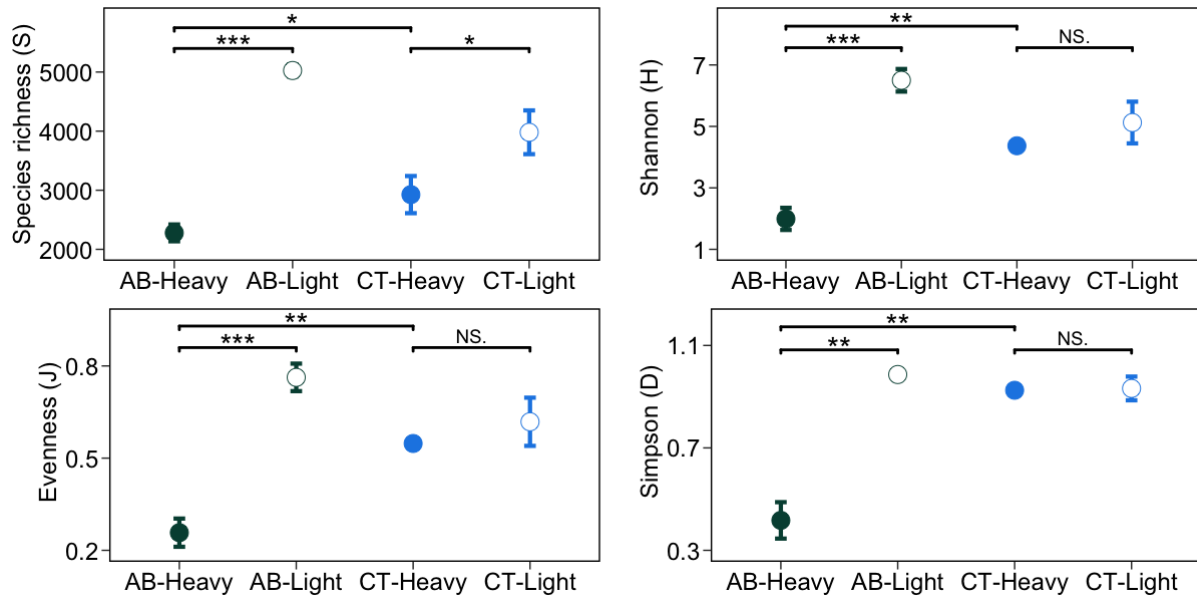

170

171 **Figure 2.** Alpha-diversity of 16S rRNA gene sequences from the “heavy” and “light” fractions of DNA

172 extracted from soils incubated with  $H_2^{18}O$  in the presence (AB) or absence (CT) of antibiotics. Alpha-

173 diversity is summarised as species richness (S), Shannon diversity (H), evenness (J), and Simpson (D).

174 “\*” corresponds to p-value <0.05 from pairwise t-test; “\*\*\*” corresponds to p-value <0.01; “\*\*\*\*”

175 corresponds to p-value <0.001; “NS.” corresponds to p-value >0.05

176

177 The microbial community composition was consistent for all replicates of both heavy and light

178 fractions across all the treatments. The community composition for heavy and light fractions of AB

179 and CT when incubated with  $H_2^{18}O$  were different as they clustered separately (Figure 3).

180 Community composition of the light fraction in  $H_2^{18}O$  incubated CT soil (18H-CT-Light) was similar to

181 both heavy (16H-CT-Heavy) and light (16H-CT-Light) fraction in  $H_2^{16}O$  incubated CT soils as shown by

182 their proximity in the PCoA plot and the relative abundance profile (Figure 4, S3). Together, these

183 three fractions (18H-CT-Light, 16H-CT-Heavy, 16H-CT-Light) along with light fraction of  $H_2^{16}O$

184 incubated AB soil (16H-AB-Heavy) were similar to the composition of the original soil.

185



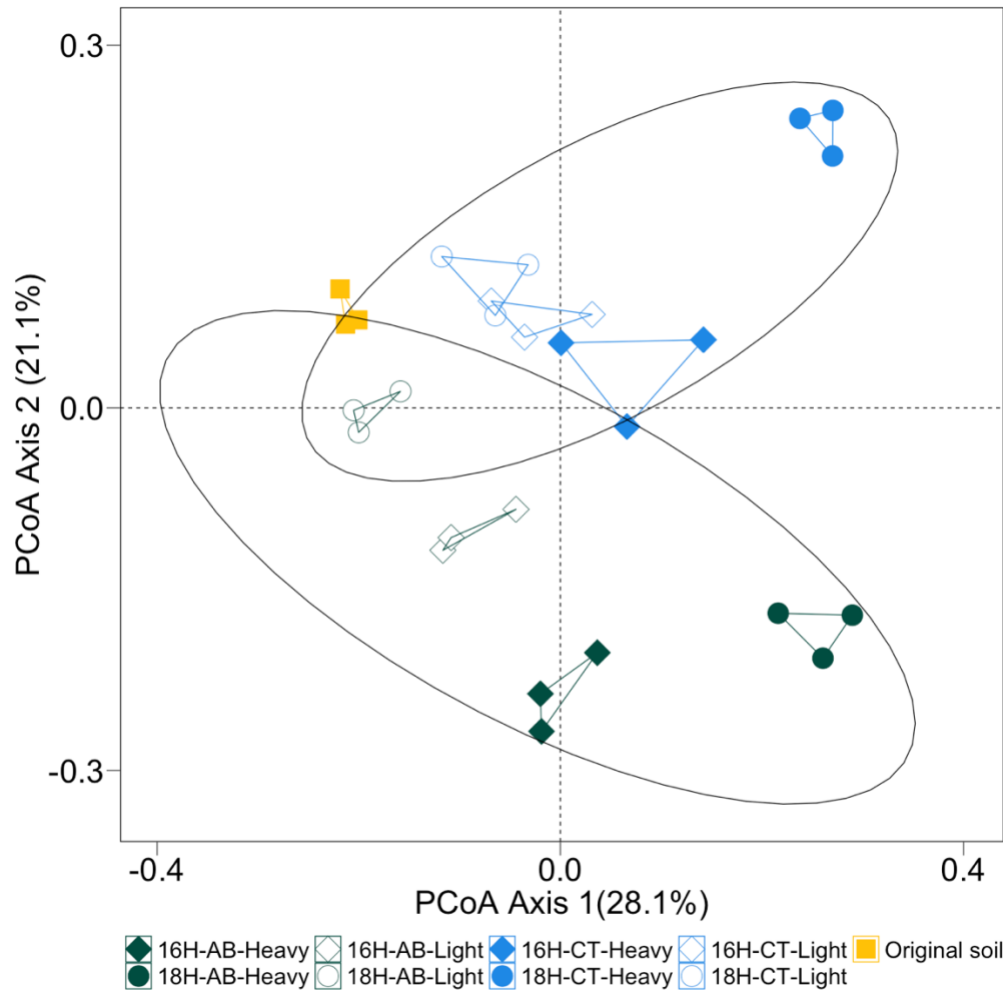

199 Acidobacteriota ( $3.9 \pm 0.83\%$ ), Saccharibacteria ( $2.3 \pm 2.22\%$ ), Actinomycetota ( $1.5 \pm 0.38\%$ ),  
200 Planctomycetota ( $1.3 \pm 0.15\%$ ), Verrucomicrobiota ( $1.24\%$ ), and Gemmatimonadota ( $1.1\%$ ). Here,  
201 *unclassified* (Pseudomonadota,  $17.18\%$ ), *Sphingomonas* (Pseudomonadota,  $11.9\%$ ), *Thermomonas*  
202 (Pseudomonadota,  $10.8\%$ ), *Arenimonas* (Pseudomonadota,  $5.28\%$ ), *Novosphingobium*  
203 (Pseudomonadota,  $7.03\%$ ) were the abundant genera (Figure 4).

204 The relative abundance in the light fractions of AB were dominated by Pseudomonadota  
205 ( $38.7 \pm 5.38\%$ ), Acidobacteriota ( $17.2 \pm 0.62\%$ ), Actinomycetota ( $12.3 \pm 4.24\%$ ), Verrucomicrobiota  
206 ( $10.9 \pm 1.01\%$ ), Planctomycetota ( $6.2 \pm 1.17\%$ ), Bacteroidota ( $3.7 \pm 0.29\%$ ), Chloroflexota (formally  
207 Chloroflexi,  $3.6 \pm 0.68\%$ ), and Gemmatimonadota ( $1.9 \pm 0.19\%$ ). The most abundant genera were  
208 *Stenotrophomonas* (Pseudomonadota,  $8.9\%$ ), *Bradyrhizobium* (Pseudomonadota,  $2.3\%$ , only in one  
209 replicate), and *Acidibacter* (Pseudomonadota,  $2.1\%$ ) (Figure 4). In contrast, the light fractions of CT  
210 were dominated by Bacteroidota ( $57.5 \pm 8.54\%$ ), Pseudomonadota ( $14.7 \pm 2.46\%$ ), Acidobacteriota  
211 ( $9.9 \pm 2.59\%$ ), Actinomycetota ( $4.7 \pm 1.79\%$ ), Verrucomicrobiota ( $4.4 \pm 1.29\%$ ), Planctomycetota ( $3.1$   
212  $\pm 0.62\%$ ), Chloroflexota ( $1.52 \pm 0.40\%$ ), and Gemmatimonadota ( $1.1 \pm 0.12\%$ ). The most abundant  
213 genus in this treatment was *Flavobacterium* (Pseudomonadota,  $38.91 \pm 4.67\%$ ) (Figure 4).

214

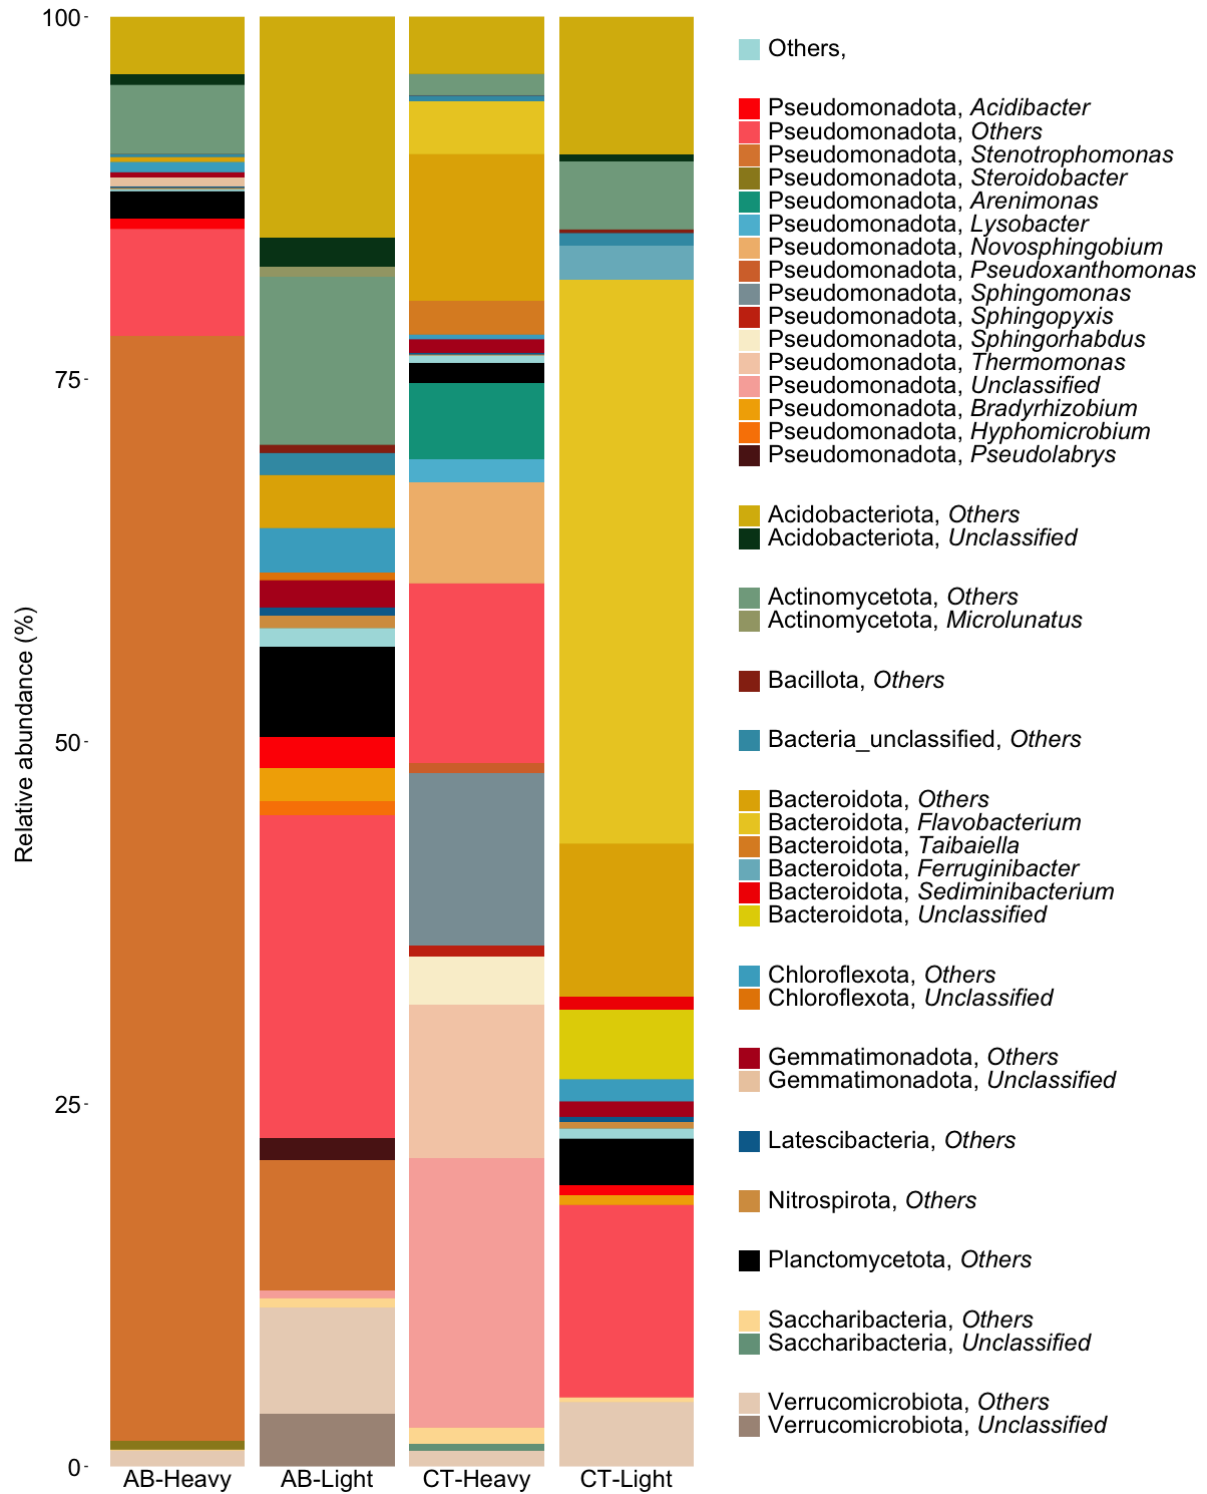

215

216

217 **Figure 4.** Relative abundance of microbial communities at the phylum level identified in the “heavy”

218 and “light” fractions of DNA extracted from soils incubated with H<sub>2</sub><sup>18</sup>O in the presence (AB) or

219 absence (CT) of antibiotics.

220

221

A heatmap was created to visualise and compare the abundance of the 20 OTUs that

222

explains the most variation in the axis-1 and axis-2 of the PCA ordination. Out of a total of 28 OTUs

223

selected, 19 OTUs belong to Pseudomonadota, followed by six OTUs of Bacteroidota, two OTUs of

224

Verrucomicrobiota, and one OTU of Acidobacteriota. *Stenotrophomonas* (Pseudomonadota; OTU-7)

225

was dominant in the heavy fraction of AB compared to heavy fraction of CT. On the other hand,

226

*Sphingomonas* (Pseudomonadota; OTU-1065, OTU-1321, OTU-2509, OTU-488405, OTU-692415),

227

*Lysobacter* (Pseudomonadota; OTU-12766), *Novosphingobium* (Pseudomonadota; OTU-14845),

228

Xanthomonadaceae (Pseudomonadota; OTU-13089), *Arenimonas* (Pseudomonadota; OTU-1764)

229

were dominant in heavy fraction of CT compared to AB. Additionally, *Pseudolabrys*

230

(Pseudomonadota; OTU-1764), DA101 (Verrucomicrobiota; OTU-424), OPB35 (Verrucomicrobiota;

231

OTU-8196) were dominant in light fractions of AB compared to heavy fractions of AB (Figure 5).

232

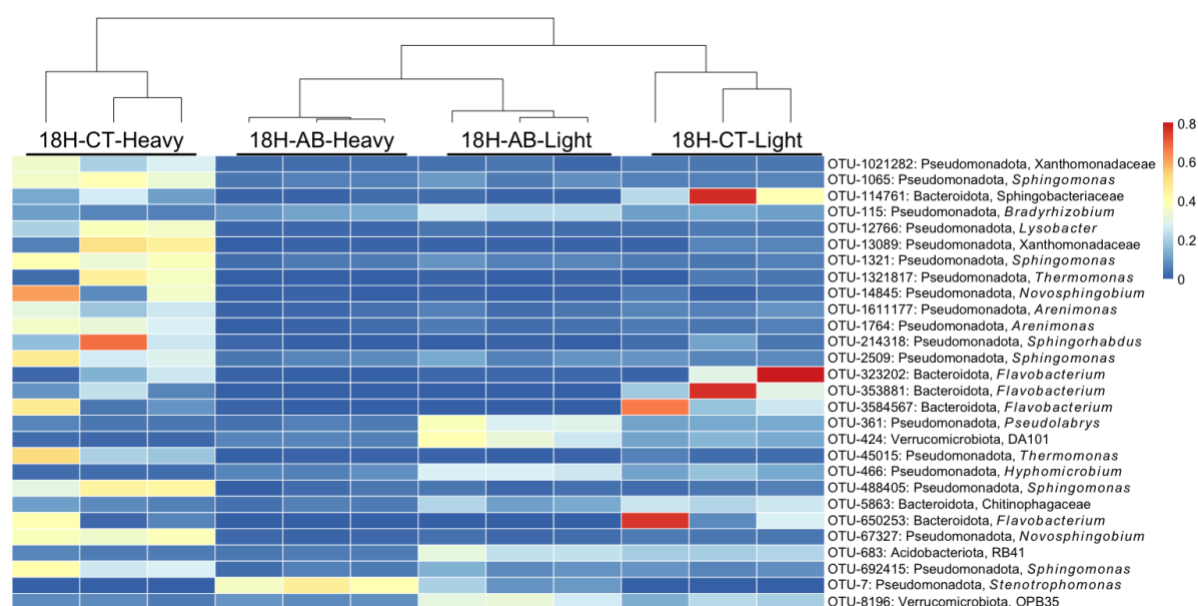

233

234

235

**Figure 5.** Heatmap of the most relevant bacterial OTUs identified in the “heavy” and “light” fractions

236

of DNA extracted from soils incubated with H<sub>2</sub><sup>18</sup>O in the presence (AB) or absence (CT) of antibiotics.

237

18H-AB-heavy indicates “heavy” fractions treated with antibiotic; 18H-AB-light indicates “light”

238 fractions treated with antibiotic; 18H-CT-heavy indicates “heavy” fractions without antibiotic  
239 treatment; 18H-CT-light indicates “light” fractions without antibiotic treatment. The coloured scale  
240 represents the relative abundance of OTUs.

241

242           The DNA of both heavy and light fractions of soil when incubated with <sup>18</sup>O-labelled water in  
243 the presence of antibiotics were sequenced individually using high-throughput sequencing. After  
244 genome binning of both heavy and light fractions, one qualified metagenome-assembled genome  
245 (MAG) was generated with 90.7% completeness and 0% contamination. The MAG was affiliated to  
246 *Stenotrophomonas* (Pseudomonadota) (Figure 6). This is in-sync with the results of 16S rRNA gene  
247 sequencing that also showed *Stenotrophomonas* (Pseudomonadota) as the dominant genus when  
248 incubated with antibiotics (Figures 4, 5).

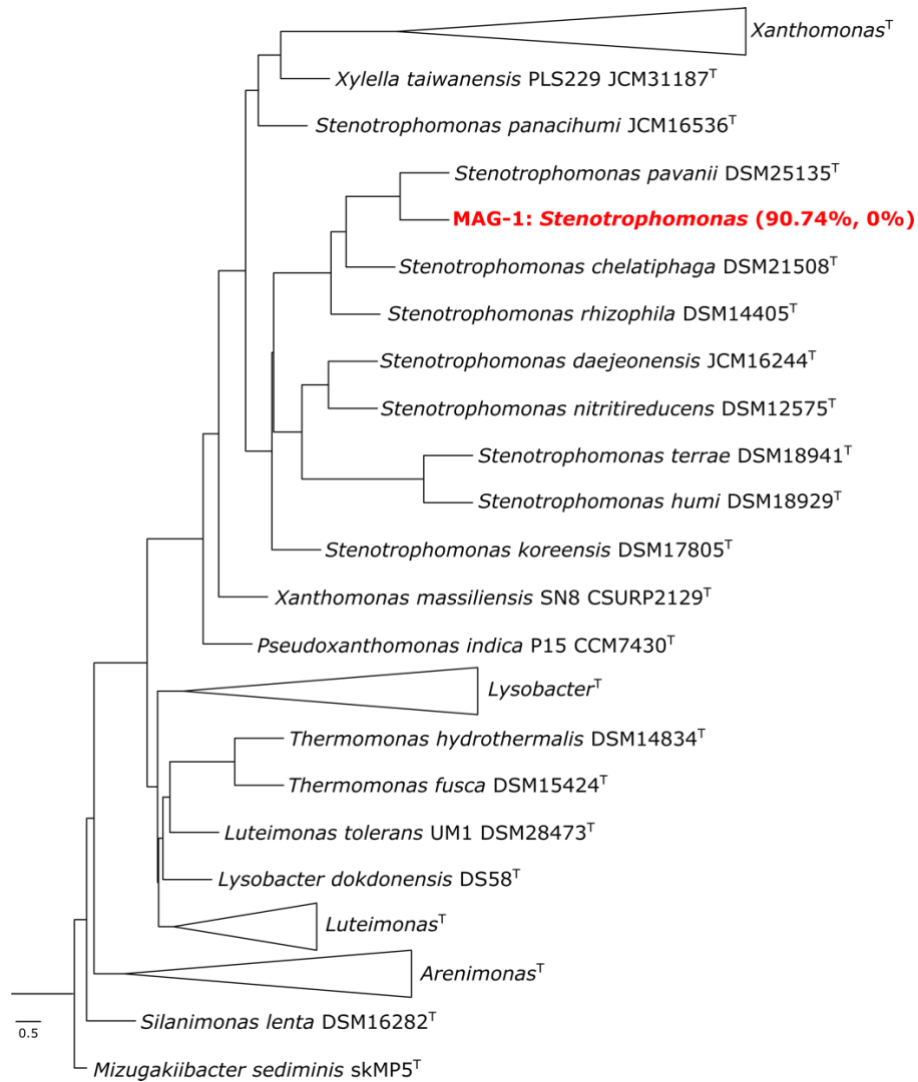

249

250 **Figure 6.** Multi-locus phylogenetic tree of the MAG-1 using autoMLST. 98 conserved housekeeping  
251 genes were used for the analyses. MAG-1 is indicated in red together with their respective  
252 completeness and contamination.

253

254 Analysis of the unbinned-assembled genomes of light and heavy fractions, along with the genome of  
255 MAG-1 helped understand whether the microbial community exposed to antibiotic contained  
256 antimicrobial resistance genes (ARGs) to survive the stress of antibiotics. The presence of *aph(3')-IIC*,  
257 with 85.46% similarity to *Stenotrophomonas maltophilia* strain K279a was observed in the heavy  
258 fraction and MAG-1, and no presence of this gene was observed in the light fraction. *aph(3')-IIC*  
259 encodes for the aminoglycoside phosphotransferase enzyme that confers resistance to antibiotics in

260 the aminoglycoside class (butirosin, paromycin, kanamycin, neomycin) among others. Similarly, the  
 261 presence of *oqxB*, with 76.28% similarity to *Escherichia coli* plasmid pOLA52 in heavy fraction and  
 262 MAG-1, which was also absent in the light fraction was also observed. The *oqxB* gene encodes for an  
 263 efflux pump that confers resistance to amphenicol class antibiotics (e.g., chloramphenicol),  
 264 disinfectants (e.g., benzalkonium chloride, cetylpyridinium chloride), quinolone class antibiotics (e.g.,  
 265 ciprofloxacin, nalidixic acid), trimethoprim, and others. However, *dfrB3*, which encodes for  
 266 dihydrofolate reductase that confers resistance to trimethoprim, was found with a 90.14% similarity  
 267 with the plasmid R751 in *Klebsiella aerogenes* only in the light fraction. The presence of ARGs that  
 268 confer resistance to beta-lactam were also found in both light and heavy fraction, but not in MAG-1.  
 269 For example, *blaTEM-181* in the light fraction was found with a 99.86% similarity with a vector pUC-  
 270 3GLA, and *blaL1* in heavy fraction with 85.84% of similarity with a beta-lactamase gene in  
 271 *Stenotrophomonas maltophilia* strain K1. No ARG conferring beta-lactam resistance was present in  
 272 MAG-1 (Table 1).

273

274 Table 1. Antimicrobial resistance genes found in the unbinned-assembled reads (from heavy and  
 275 light fractions) and MAG-1

| Antimicrobial            | Class                        | light | heavy | MAG-1 | Gene (Similarity (%) / Reference*) |                                       |                                       |
|--------------------------|------------------------------|-------|-------|-------|------------------------------------|---------------------------------------|---------------------------------------|
|                          |                              |       |       |       | Light                              | Heavy                                 | MAG-1                                 |
| Butirosin                |                              |       | X     | X     |                                    |                                       |                                       |
| Paromomycin              | Aminoglycoside               |       | X     | X     |                                    | aph(3')-IIc<br>(85.46% /<br>AM743169) | aph(3')-IIc<br>(85.46% /<br>AM743169) |
| Kanamycin                |                              |       | X     | X     |                                    |                                       |                                       |
| Neomycin                 |                              |       |       | X     | X                                  |                                       |                                       |
| Chloramphenicol          | Amphenicol                   |       | X     | X     |                                    |                                       |                                       |
| Benzylkonium chloride    | Quaternary ammonium compound |       | X     | X     |                                    | OqxB<br>(76.28% /<br>EU370913)        | OqxB<br>(76.28% /<br>EU370913)        |
| Cetylpyridinium chloride | Quaternary ammonium compound |       | X     | X     |                                    |                                       |                                       |

|                     |                           |   |   |   |                                |                                                   |
|---------------------|---------------------------|---|---|---|--------------------------------|---------------------------------------------------|
| Ciprofloxacin       | Quinolone                 |   | X | X |                                |                                                   |
| Nalidixic acid      | Quinolone                 |   | X | X |                                |                                                   |
| Trimethoprim        | Folate pathway antagonist | X | X | X | dfrB3 (90.14% / X72585)        | OqxB (76.28% / EU370913) OqxB (76.28% / EU370913) |
| Unknown beta-lactam | Beta-lactam               | X | X |   | blaTEM-181 (99.86% / KM977568) | blaL1 (85.84% / EF126059)                         |

276 \* AM743169: *Stenotrophomonas maltophilia* strain K279a; EU370913: *Escherichia coli* plasmid  
 277 pOLA52; X72585: *Klebsiella aerogenes* plasmid R751 genes from integron element; KM977568:  
 278 Cloning and transformation vector pUC-3GLA; EF126059: *Stenotrophomonas maltophilia* strain K1  
 279 (beta-lactamase gene).  
 280

281

## 282 Discussion

283 In this study we used DNA-SIP with H<sub>2</sub><sup>18</sup>O to identify the antibiotic resistant microbes from the active  
 284 pool of an agricultural soil microbiome that was not previously exposed to antibiotics. The results  
 285 showed that microbes can grow in the presence of antibiotic even in the agricultural soil with no-  
 286 antibiotic history (Figure 1). On the other hand, not all active microbes are antibiotic resistant, since  
 287 community composition was different between antibiotic treated and untreated soil (Figures 2-5).  
 288 The metagenomic analyses revealed the presence of ARGs in the active resistant microbial  
 289 community (Table 1). Additionally, a MAG belonging to *Stenotrophomonas* was found in the heavy  
 290 fraction after incubation with H<sub>2</sub><sup>18</sup>O and antibiotics. The study highlights the ability of DNA-SIP with  
 291 H<sub>2</sub><sup>18</sup>O to identify active antibiotic resistant microbes.

292 The results showed that microbes in soils without prior exposure to antibiotic can harbour  
 293 microbes that can become active and enriched in the presence of antibiotics during a short period of  
 294 time, in this case after four days of incubation. This suggests that soils contain a seedbank of  
 295 antibiotic resistance, and the microbiome can shift dramatically towards an enrichment of antibiotic  
 296 resistant populations even after a short exposure to antibiotics. This also highlights the potential of  
 297 soil to harbour native AMR bacteria, for these microbes to become dominant, and subsequently



298 spread after exposure to antibiotics. The long-term consequence of shifts in community  
299 composition, for example biogeochemical transformations, soil fertility, and disease risk is not clear  
300 [25].

301 The AMR bacterial seedbank in soil could be a result of *in situ* selection as a consequence of  
302 natural production of antimicrobials produced by the microbial community as microbes compete for  
303 resources. Indeed, soils intrinsically harbour AMR bacteria and are a natural reservoir for ARGs  
304 [7,12]. Alternatively, antibiotic resistant bacteria or ARGs could have been introduced to the soil  
305 from external sources. This is common in soils exposed to livestock manure or sludge [9,18].  
306 Moreover, the dispersal through unconventional sources such as birds can provide the initial seed  
307 for the microbial communities to spread AMR. Birds have been shown to spread AMR through long-  
308 distance and localised migration [26,27]. For example, Franklin's gulls (*Leucophaeus pipixcan*) in  
309 Chile were found to have twice the prevalence of ESBL-producing *E. coli* compared to humans in the  
310 same area along with high sequence similarity suggesting transmission. Interestingly, the gulls also  
311 share sequences with drug-resistant human pathogens identified in clinical isolates from the central  
312 Canadian region, which is a nesting place for these gulls [27]. However, more studies are needed to  
313 decisively establish the roles of birds to encounter and acquire active antibiotic resistant microbes in  
314 soils without prior exposure to antibiotic. Horizontal gene transfer (HGT) is another mechanism for  
315 ARG accumulation within a community but there was no evidence for this in the present study.

316 The active pool of antibiotic resistant microbes was dominated by Pseudomonadota,  
317 Actinomycetota, Acidobacteriota (Figures 4, 5). Pseudomonadota are known to be physiologically  
318 and metabolically versatile with variable morphology that allows them to subsist in various  
319 ecological niches [28–33]. This could be the reason why 72-84% of the OTUs labelled in the presence  
320 of antibiotics were affiliated to Pseudomonadota (Figures 4, 5, S3, S4). Further, due to their  
321 versatility, Pseudomonadota also contain the greatest number of bacterial pathogens to an extent  
322 that this phylum has been proposed to be a potential diagnostic signature for disease risk [34,35].  
323 Actinomycetota is another near ubiquitous phylum in soil that are known for their ability to

324 synthesize diverse secondary metabolites and harbour different ARGs [33,36,37]. It is hypothesised  
325 that in soils, ARGs of pathogenic Pseudomonadota originated from Actinomycetota through  
326 horizontal gene transfer using conjugative plasmids [38–40]. These results reaffirm the role of  
327 Actinomycetota in AMR spread and high abundance in AMR microbiomes. Similarly, Acidobacteriota  
328 is also widespread in soil with phylogenetic depth and ecological importance comparable to  
329 Pseudomonadota [33,41]. Acidobacteriota can harbour multiple integrative and conjugative  
330 elements in their genome, a major determinant of horizontal gene transfer, that confers them a  
331 major advantage to survive, resist, and persist in the presence of antibiotic [42,43].

332 In this study, *Stenotrophomonas* was found to be the dominant genus with a relative  
333 abundance of 76% in the active resistant microbiome (Figures 4, 5, 6) and it possessed ARGs for  
334 diverse antibiotics (see MAG-1 in Table 1). *Stenotrophomonas* is an antibiotic resistant opportunistic  
335 pathogen that is commonly linked to respiratory infections in humans [44]. Possession of a wide  
336 range of ARGs by *Stenotrophomonas* in an antibiotic unexposed soil is disturbing, but not unusual  
337 and rare. For instance, on one hand, ARG in *Stenotrophomonas* strains has been reported from  
338 deep-sea invertebrates [45]. On the other hand, multi-drug resistant *Stenotrophomonas* is a  
339 common nosocomial and community-acquired infection [44].

340 The active pool of antibiotic resistant microbiota in this agricultural soil contains ARGs for a  
341 wide variety of antibiotics (Table 1). Surprisingly, many of these antibiotics such as aminoglycosides,  
342 chloramphenicol, were not even part of the experiment in this study. This highlights the potential  
343 role of the seedbank of resistant bacteria in AMR spread. We hypothesize that these microbes are  
344 present in soils at low abundance but with selection can become enriched increasing the probability  
345 of causing disease outbreaks in livestock and human populations. Their enrichment may also spread  
346 resistance within the microbial community through HGT.

347

348 **Conclusion**

349 In this study, the active resistant soil microbiome from an agricultural field with no prior history of  
350 antibiotic exposure using DNA-SIP with H<sub>2</sub><sup>18</sup>O was identified and differences in the composition of  
351 active soil microbes and active antibiotic resistant soil microbes was observed. The metagenome  
352 data shed light on the diversity of antibiotic resistant genes of the resistant microbiome. In this  
353 study, we identified the prevalence of antibiotic resistant *Stenotrophomonas* in the soil, which might  
354 be consequential for AMR spread and disease risk. Overall, this study makes a strong case for DNA-  
355 SIP with H<sub>2</sub><sup>18</sup>O to identify the clinically important drug-resistant microbes in the environment.  
356 Finally, this method can become gold standard to understand and identify the drivers of AMR spread  
357 in any environment.

358

## 359 **Materials and methods**

### 360 **Soil sampling**

361 Agricultural soils from Chilworth Manor Experimental plots located in the Victorian Walled Gardens  
362 (Southampton, U.K.) was sampled in October 2016. This soil does not have history of manure and no  
363 antibiotic applications for over 20 years. Also, the last application of herbicide Round-up (Glyphosate  
364 at a concentration of 360 g L<sup>-1</sup> as active ingredient) was in 2007-2008 (M. Cotton, *pers. comm.*).  
365 Samples were collected from 10-cm deep in a 10m triangular pattern as described previously  
366 (Gomez- Alvarez et al., 2007). In total, three soil samples (not pooled) were transported to the  
367 University of Southampton and storage at 4°C for further experiments. Physico-chemical parameters  
368 were carried out at the Anglian soil analyses company (Lincolnshire, U.K.) and detailed in Table S1.  
369 This soil is a sandy/loam soil with a pH of 6.17 (±0.006), organic matter of 7.73% (±1.43) and dry  
370 matter of 85.99% (±3.58).

371

### 372 **Soil incubations**

373 Initial tests were performed to determine the concentration of antibiotic necessary to inhibit  
374 bacterial growth in soil for up to 12 days. This is necessary due to potential attenuation of the

375 antibiotic by soil (for methodology see Appendix S1). Since the attenuation of the antibiotic is as fast  
376 as two days (Figure S1), a second preliminary experiment was carried out by incubating the soils with  
377 several antibiotics to determine the suitable ones to be used for further labelling experiment.  
378 Antibiotics were chosen because of their mechanism of action and described in Appendix S1. The  
379 resistance genes for these antibiotics have been found in the genome of *Klebsiella pneumoniae* [46].  
380 After performing the preliminary experiments, we decided to incubate the soils for up to 4 days due  
381 to its fast decomposition (Figure S1) and four antibiotics were chosen for further incubations with  
382 H<sub>2</sub><sup>18</sup>O (Table S2). One g of soil was incubated in 1.5 ml of with either label water (H<sub>2</sub><sup>18</sup>O) or  
383 unlabelled water (H<sub>2</sub>O). Antibiotics [meropenem (mem), cefotaxime (ctx), ciprofloxacin (cip) and  
384 trimethoprim (tmp)] at a concentration of 100 µg/ml each were added to the slurry at time 0 h and  
385 48 h. Incubations were performed at 200 rpm, dark and room temperature. Sampling time for the  
386 treatment was at day 2 and day 4. For controls, sampling was carried out after 4 days of incubation.  
387 The experiments were performed in triplicate to provide statistically testable data (Figure S2).

388

### 389 **DNA extraction**

390 DNA was extracted from the soil at the end of the treatments by using the Power-Soil DNA isolation  
391 kit (Mo Bio, UK) according to the manufacturer's recommendation. DNA purity and quantification  
392 were determined using a NanoDrop® Spectrophotometer ND-1000 (Thermo Fisher Scientific, USA).  
393 All DNA samples were stored at -80°C for further analysis.

394

### 395 **H<sub>2</sub><sup>18</sup>O-SIP procedure**

396 A standard DNA-SIP protocol was used to resolve [<sup>18</sup>O]-incorporation based on buoyant density [47].  
397 1 µg of genomic DNA was loaded into 5.6-ml polyallomer quick-seal centrifuge tubes (Beckman  
398 Coulter, USA) containing gradient buffer [20] and CsCl. The isopycnic centrifugation of DNA was  
399 performed with an initial CsCl buoyant density of 1.725 g mL<sup>-1</sup> subjected to centrifugation at 177,000

400 × g for 36-40 h at 20 °C in an Optima XPN-80 ultracentrifuge (Beckman Coulter, USA). At the end of  
401 the centrifugation, 18 fractions were separated from each gradient.

402

### 403 **Quantitative PCR**

404 The 16S rRNA gene was quantified in each of the fractions. All qPCR reactions were performed on a  
405 StepOne Plus real-time PCR system (Applied Biosystems) and the data were processed using  
406 StepOne software v2.3 (Applied Biosystems). For all assays, standards were prepared by PCR of  
407 cloned genes. Standards were serially ( $10^1$ – $10^7$ ) diluted and used for the calibration curves in each  
408 assay. Controls were run with water instead of template DNA. The assays were based on dual-  
409 labelled probes using the primer–probe sets: BAC338F/BAC516P/BAC805R [48]. The probe was  
410 synthesized with 6-Carboxyfluorescein (6-FAM) on their 5' end and Black Hole Quencher 1 (BHQ1) on  
411 their 3' end. Each reaction was 20 μL in volume and contained the following mixture: 10 μL of  
412 TaqMan fast advanced master mix (1X) (Applied Biosystems), 1.0 μL of primer mix [18 μL BAC338F  
413 (0.9 μM), 18 μL BAC805R (0.9 μM), 5 μL BAC516P (0.25 μM) and 59 μL of TE buffer], DNA template  
414 (2.0 μL) and 7.0 μL of water. The program used was 95°C for 5 min, followed by 35 cycles of 95°C for  
415 30 s and 62°C for 60 s for annealing, extension and signal acquisition respectively [49]. Efficiencies of  
416 97 to 103% with  $R^2$  values > 0.98 were obtained.

417

### 418 **High-throughput sequencing**

419 The 16S rRNA genes from SIP gradient fractions was amplified and sequenced by barcoded Illumina  
420 sequencing. PCR primers 515FB (GTGYCAGCMGCCGCGGTAA) and 806RB  
421 (GGACTACNVGGGTWTCTAAT) from the Earth Microbiome project  
422 (<http://press.igsb.anl.gov/earthmicrobiome/>) targeting the V4 region of the 16S rRNA gene  
423 (approximately 250 nucleotides) were used. Library preparation and sequencing was performed at  
424 the National Oceanographic Centre (NOC) of the University of Southampton, UK, following

425 methodologies described by [50]. Samples were pooled in an equimolar concentration and  
426 sequenced on separate runs for MiSeq using a 2 bp × 300 bp paired end protocol.  
427 The total metagenomic DNA of the heavy and light fractions from incubations with H<sub>2</sub><sup>18</sup>O (total of six  
428 samples) were sequenced on an Illumina MiSeq at the University of Southampton (as described  
429 above). The metagenome was analysed on a high-performance computing cluster supported by the  
430 Research and Specialist Computing Support Service at the University of East Anglia (Norwich, UK).

431

### 432 **Bioinformatic Analyses**

433 For the 16S rRNA-sequencing, quality filtering of the sequences was carried out by using cutadapt  
434 [51]. Forward and reverse reads were then merged by using the usearch fastq\_mergepairs command  
435 [52]. Downstream processing was performed by using UPARSE [52] and UCHIME pipelines [53].  
436 Briefly, sequences shorter than 250 bp were discarded, singletons were retained, and operational  
437 taxonomic units (OTUs) were defined at a sequence identity level of 97%.

438

439 For the DNA sequences, reads were checked using FastQC version 0.11.8 [54]. Low-quality reads  
440 were discarded using BBDuk version 38.68 [55]. Afterwards, reads were merged into scaffolds using  
441 de novo assembler metaSPAdes version 3.13.1 [56]. Binning of the assembled scaffolds from both  
442 heavy and light fractions was carried out with the metaWRAP version 1.2.1 [57]. Completion and  
443 contamination metrics of the extracted bins were estimated using CheckM [58]. The resulting bins  
444 were collectively processed to produce consolidated metagenome-assembled genomes (MAGs)  
445 using the bin\_refinement module in metaWRAP.

446

### 447 **Statistical analyses and OTU Classification**

448 Statistical analyses were performed using the 'vegan' package [59] in R software version 4.1.1. Tests  
449 with P<0.05 were considered to be statistically significant. Shapiro-Wilk normality test was  
450 performed for each analysis. ANOVA was performed when abundance data were normally

451 distributed. A non-parametric Kruskal-Wallis one-way analysis of variance was performed when the  
452 data were not normally distributed [60]. In parallel, to test the significance of the differences  
453 between 2 samples (i.e., between heavy and light fractions), two-tailed independent t-tests were  
454 done. For all OTU-based statistical analyses, the data set was normalized by a Hellinger  
455 transformation [61] using the decostand function. For beta-diversity, principal coordinates analysis  
456 (PCoA) ordination of Hellinger distances was carried out using the 'pcoa' function. Heatmaps were  
457 constructed with 'pheatmap' package [62] for the OTUs explaining most of the differences between  
458 samples. Principal component analysis (PCA) of the Hellinger transformed data was performed using  
459 the prcomp function. The 20 OTUs explaining most of the differences between samples were  
460 defined as the OTUs contributing the largest absolute loadings in the first and second dimensions of  
461 the PCA [60], obtained from the rotation output file. Hierarchical clustering of the distance matrix  
462 was carried out with the "ward.D2" method using 'hclust' function.

463

#### 464 **Taxonomy Analysis**

465 A representative sequence of each OTU was aligned against the SILVA 16S rRNA gene database using  
466 the naïve Bayesian classifier (bootstrap confidence threshold of 80%) by using the mothur software  
467 platform [63].

468 The taxonomic classification of the MAG was performed as explained previously [64]. Briefly, DNA–  
469 DNA hybridization (dDDH) was conducted using the Type Strain Genome Server (TYGS) [65]. Amino-  
470 acid comparisons between the MAG retrieved in this study and their closest relative strains were  
471 calculated based on reciprocal best hits (two-way amino acid identity AAI) using the enveomics  
472 collection [66]. Finally, a phylogenomic tree was created using the automated multi-locus species  
473 tree (autoM-LST) pipeline [67]. AutoMLST determines closely related genomes based on alignment  
474 of >90 core genes, and the closest species were determined based on percent average nucleotide  
475 identity (ANI).

476

477 **Antimicrobial resistance genes**

478 Since only one MAG was recovered in this study, the unbinned-assembled reads (from heavy and  
479 light fractions) were also analysed. Therefore, all (MAG-1, unbinned heavy fractions and unbinned  
480 light fractions) reads were screened for antimicrobial resistance genes (ARGs) using the public  
481 database Resfinder version 4.1 [68].

482

483 **Acknowledgements**

484 The authors thank Mike Cotton (University of Southampton) for helping with soil sampling. This  
485 study was supported by NERC pump priming grant (NE/N02026X/1). S.R. was supported by a NERC-  
486 NEOF grant (NEOF1490). M.H. gratefully acknowledges Royal Society Dorothy Hodgkin Research  
487 Fellowship (DHF\R1\211076).

488

489 **Authors' contributions**

490 MH, CWK and MGD planned the experiments. MH carried out experimental work. MH carried out  
491 bioinformatic analysis. MH, SR and MGD analysed the data. MH and SR wrote the manuscript. All  
492 authors read and approved the final manuscript.

493

494 **Funding**

495 Work on this project was supported by NERC pump priming (grant number NE/N02026X/1).

496

497 **Availability of data and materials**

498 Sequence data were deposited in the NCBI Sequence Read Archive (SRA) under accession number  
499 PRJNA428598 for 16S rRNA gene sequences, PRJNA602606 for raw metagenome data, and  
500 PRJNA778335 for MAG-1.

501

502 **Ethics approval and consent to participate**



503 Not applicable.

504 **Consent for publication**

505 Not applicable.

506 **Competing interests**

507 The authors declare that they have no competing interests.

508

509 **References**

- 510 1. Allen HK, Donato J, Wang HH, Cloud-Hansen KA, Davies J, Handelsman J. Call of the  
511 wild: antibiotic resistance genes in natural environments. *Nat Rev Microbiol.* 2010;8:251–9.
- 512 2. Popowska M, Rzeczycka M, Miernik A, Krawczyk-Balska A, Walsh F, Duffy B. Influence  
513 of soil use on prevalence of tetracycline, streptomycin, and erythromycin resistance and  
514 associated resistance genes. *Antimicrob Agents Chemother.* American Society for  
515 Microbiology; 2012;56:1434–43.
- 516 3. Teuber M. Veterinary use and antibiotic resistance. *Curr Opin Microbiol.* 2001;4:493–9.
- 517 4. Willms IM, Kamran A, Aßmann NF, Krone D, Bolz SH, Fiedler F, et al. Discovery of  
518 novel antibiotic resistance determinants in forest and grassland soil metagenomes. *Front*  
519 *Microbiol.* Frontiers Media S.A.; 2019;10:460.
- 520 5. Zheng Z, Li L, Makhalanyane TP, Xu C, Li K, Xue K, et al. The composition of antibiotic  
521 resistance genes is not affected by grazing but is determined by microorganisms in grassland  
522 soils. *Science of the Total Environment.* Elsevier B.V.; 2021;761:143205.
- 523 6. Hwengwere K, Paramel Nair H, Hughes KA, Peck LS, Clark MS, Walker CA.  
524 Antimicrobial resistance in Antarctica: is it still a pristine environment? *Microbiome.*  
525 *BioMed Central Ltd;* 2022;10:1–13.
- 526 7. Nesme J, Cécillon S, Delmont TO, Monier JM, Vogel TM, Simonet P. Large-scale  
527 metagenomic-based study of antibiotic resistance in the environment. *Current Biology.* Cell  
528 Press; 2014;24:1096–100.
- 529 8. Fan H, Wu S, Dong W, Li X, Dong Y, Wang S, et al. Characterization of tetracycline-  
530 resistant microbiome in soil-plant systems by combination of H218O-based DNA-Stable  
531 isotope probing and metagenomics. *J Hazard Mater.* Elsevier B.V.; 2021;420.
- 532 9. Jadeja NB, Worrich A. From gut to mud: dissemination of antimicrobial resistance  
533 between animal and agricultural niches. *Environ Microbiol.* John Wiley and Sons Inc;  
534 2022;24:3290–306.
- 535 10. van Goethem MW, Pierneef R, Bezuidt OKI, van de Peer Y, Cowan DA, Makhalanyane  
536 TP. A reservoir of “historical” antibiotic resistance genes in remote pristine Antarctic soils.  
537 *Microbiome.* BioMed Central Ltd.; 2018;6:1–12.
- 538 11. Bi R, Kong Z, Qian H, Jiang F, Kang H, Gu B, et al. High Prevalence of bla<sub>NDM</sub>  
539 Variants Among Carbapenem-Resistant *Escherichia coli* in Northern Jiangsu Province,  
540 China. *Front Microbiol.* Frontiers Media S.A.; 2018;9:2704.
- 541 12. Nesme J, Simonet P. The soil resistome: a critical review on antibiotic resistance origins,  
542 ecology and dissemination potential in telluric bacteria. *Environ Microbiol.* 2015;17:913–30.
- 543 13. Chen QL, Cui HL, Su JQ, Penuelas J, Zhu YG. Antibiotic Resistomes in Plant  
544 Microbiomes. *Trends Plant Sci.* Elsevier Ltd; 2019;24:530–41.

- 545 14. Cerqueira F, Christou A, Fatta-Kassinos D, Vila-Costa M, Bayona JM, Piña B. Effects of  
546 prescription antibiotics on soil- and root-associated microbiomes and resistomes in an  
547 agricultural context. *J Hazard Mater. Elsevier B.V.*; 2020;400:123208.
- 548 15. Urrea J, Alkorta I, Mijangos I, Epelde L, Garbisu C. Application of sewage sludge to  
549 agricultural soil increases the abundance of antibiotic resistance genes without altering the  
550 composition of prokaryotic communities. *Science of the Total Environment. Elsevier B.V.*;  
551 2019;647:1410–20.
- 552 16. Foley JA, Ramankutty N, Brauman KA, Cassidy ES, Gerber JS, Johnston M, et al.  
553 Solutions for a cultivated planet. *Nature*. 2011;478:337–42.
- 554 17. Soils for nutrition: state of the art. FAO; 2022.
- 555 18. Thanner S, Drissner D, Walsh F. Antimicrobial resistance in agriculture. *mBio. American*  
556 *Society for Microbiology*; 2016;7:e02227-15.
- 557 19. Schwartz E. Characterization of growing microorganisms in soil by stable isotope  
558 probing with H<sub>2</sub><sup>18</sup>O. *Appl Environ Microbiol*. 2007;73:2541–6.
- 559 20. Dumont MG, Hernández M, editors. *Stable Isotope Probing*. New York, NY: Springer  
560 New York; 2019.
- 561 21. Aanderud ZT, Lennon JT. Validation of heavy-water stable isotope probing for the  
562 characterization of rapidly responding soil bacteria. *Appl Environ Microbiol*. 2011;77:4589–  
563 96.
- 564 22. Spohn M, Pötsch EM, Eichorst SA, Wobken D, Wanek W, Richter A. Soil microbial  
565 carbon use efficiency and biomass turnover in a long-term fertilization experiment in a  
566 temperate grassland. *Soil Biol Biochem. Elsevier Ltd*; 2016;97:168–75.
- 567 23. Blazewicz SJ, Hungate BA, Koch BJ, Nuccio EE, Morrissey E, Brodie EL, et al. Taxon-  
568 specific microbial growth and mortality patterns reveal distinct temporal population  
569 responses to rewetting in a California grassland soil. *ISME Journal. Springer Nature*;  
570 2020;14:1520–32.
- 571 24. Purcell AM, Hayer M, Koch BJ, Mau RL, Blazewicz SJ, Dijkstra P, et al. Decreased  
572 growth of wild soil microbes after 15 years of transplant-induced warming in a montane  
573 meadow. *Glob Chang Biol. John Wiley and Sons Inc*; 2022;28:128–39.
- 574 25. Reed HE, Martiny JBH. Testing the functional significance of microbial composition in  
575 natural communities. *FEMS Microbiol Ecol. John Wiley & Sons, Ltd*; 2007;62:161–70.
- 576 26. Hernández J, González-Acuña D. Anthropogenic antibiotic resistance genes mobilization  
577 to the polar regions. *Infect Ecol Epidemiol. Taylor & Francis*; 2016;6:32112.
- 578 27. Hernandez J, Johansson A, Stedt J, Bengtsson S, Porczak A, Granholm S, et al.  
579 Characterization and Comparison of Extended-Spectrum  $\beta$ -Lactamase (ESBL) Resistance  
580 Genotypes and Population Structure of *Escherichia coli* Isolated from Franklin's Gulls  
581 (*Leucophaeus pipixcan*) and Humans in Chile. *PLoS One. Public Library of Science*;  
582 2013;8:e76150.
- 583 28. Degli Esposti M. Bioenergetic Evolution in Proteobacteria and Mitochondria. *Genome*  
584 *Biol Evol. Oxford Academic*; 2014;6:3238–51.
- 585 29. Dantas G, Sommer MOA, Oluwasegun RD, Church GM. Bacteria subsisting on  
586 antibiotics. *Science (1979). American Association for the Advancement of Science* ;  
587 2008;320:100–3.
- 588 30. Paun VI, Lavin P, Chifiriuc MC, Purcarea C. First report on antibiotic resistance and  
589 antimicrobial activity of bacterial isolates from 13,000-year old cave ice core. *Sci Rep.*  
590 *Nature Publishing Group*; 2021;11:1–15.
- 591 31. Bradley PH, Pollard KS. Proteobacteria explain significant functional variability in the  
592 human gut microbiome. *Microbiome. BioMed Central Ltd.*; 2017;5:1–23.
- 593 32. Campbell BJ, Engel AS, Porter ML, Takai K. The versatile  $\epsilon$ -proteobacteria: key players  
594 in sulphidic habitats. *Nat Rev Microbiol. Nature Publishing Group*; 2006;4:458–68.

- 595 33. Delgado-Baquerizo M, Oliverio AM, Brewer TE, Benavent-González A, Eldridge DJ,  
596 Bardgett RD, et al. A global atlas of the dominant bacteria found in soil. *Science* (1979).  
597 American Association for the Advancement of Science; 2018;359:320–5.
- 598 34. Shin NR, Whon TW, Bae JW. Proteobacteria: microbial signature of dysbiosis in gut  
599 microbiota. *Trends Biotechnol. Elsevier Current Trends*; 2015;33:496–503.
- 600 35. Rizzatti G, Lopetuso LR, Gibiino G, Binda C, Gasbarrini A. Proteobacteria: A common  
601 factor in human diseases. *Biomed Res Int. Hindawi Limited*; 2017;2017:9351507.
- 602 36. D’Costa VM, McGrann KM, Hughes DW, Wright GD. Sampling the Antibiotic  
603 Resistome. *Science* (1979). 2006;311:374–7.
- 604 37. Fatahi-Bafghi M. Antibiotic resistance genes in the Actinobacteria phylum. *European  
605 Journal of Clinical Microbiology & Infectious Diseases. Springer*; 2019;38:1599–624.
- 606 38. Benveniste R, Davies J. Aminoglycoside Antibiotic-Inactivating Enzymes in  
607 Actinomycetes Similar to Those Present in Clinical Isolates of Antibiotic-Resistant Bacteria.  
608 *Proceedings of the National Academy of Sciences. Proceedings of the National Academy of  
609 Sciences*; 1973;70:2276–80.
- 610 39. Klümper U, Riber L, Dechesne A, Sannazzarro A, Hansen LH, Sørensen SJ, et al. Broad  
611 host range plasmids can invade an unexpectedly diverse fraction of a soil bacterial  
612 community. *ISME J. Nature Publishing Group*; 2014;9:934–45.
- 613 40. Jiang X, Ellabaan MMH, Charusanti P, Munck C, Blin K, Tong Y, et al. Dissemination of  
614 antibiotic resistance genes from antibiotic producers to pathogens. *Nat Commun. Nature  
615 Publishing Group*; 2017;8:1–7.
- 616 41. Barns SM, Takala SL, Kuske CR. Wide Distribution and Diversity of Members of the  
617 Bacterial Kingdom Acidobacterium in the Environment. *Appl Environ Microbiol. American  
618 Society for Microbiology (ASM)*; 1999;65:1731.
- 619 42. Gonçalves OS, Santana MF. The coexistence of monopartite integrative and conjugative  
620 elements in the genomes of Acidobacteria. *Gene. Elsevier*; 2021;777:145476.
- 621 43. Challacombe J, Kuske C. Mobile genetic elements in the bacterial phylum Acidobacteria.  
622 *Mob Genet Elements. Taylor & Francis*; 2012;2:179–83.
- 623 44. Brooke JS. *Stenotrophomonas maltophilia*: An emerging global opportunistic pathogen.  
624 *Clin Microbiol Rev. American Society for Microbiology 1752 N St., N.W., Washington, DC  
625 ; 2012;25:2–41.*
- 626 45. Romanenko LA, Uchino M, Tanaka N, Frolova GM, Slinkina NN, Mikhailov V v.  
627 Occurrence and antagonistic potential of *Stenotrophomonas* strains isolated from deep-sea  
628 invertebrates. *Arch Microbiol. Springer*; 2008;189:337–44.
- 629 46. Doi Y, Hazen TH, Boitano M, Tsai YC, Clark TA, Korlach J, et al. Whole-genome  
630 assembly of *Klebsiella pneumoniae* coproducing NDM-1 and OXA-232 carbapenemases  
631 using single-molecule, real-time sequencing. *Antimicrob Agents Chemother. American  
632 Society for Microbiology*; 2014;58:5947–53.
- 633 47. Neufeld JD, Vohra J, Dumont MG, Lueders T, Manfield M, Friedrich MW, et al. DNA  
634 stable-isotope probing. *Nature Protocols* 2007 2:4. *Nature Publishing Group*; 2007;2:860–6.
- 635 48. Yu Y, Lee C, Kim J, Hwang S. Group-specific primer and probe sets to detect  
636 methanogenic communities using quantitative real-time polymerase chain reaction.  
637 *Biotechnol Bioeng. John Wiley & Sons, Ltd*; 2005;89:670–9.
- 638 49. Hernández M, Calabi M, Conrad R, Dumont MG. Analysis of the microbial communities  
639 in soils of different ages following volcanic eruptions. *Pedosphere. Elsevier*; 2020;30:126–  
640 34.
- 641 50. Caporaso JG, Lauber CL, Walters WA, Berg-Lyons D, Huntley J, Fierer N, et al. Ultra-  
642 high-throughput microbial community analysis on the Illumina HiSeq and MiSeq platforms.  
643 *ISME J. Nature Publishing Group*; 2012;6:1621–4.

- 644 51. Martin M. Cutadapt removes adapter sequences from high-throughput sequencing reads.  
645 EMBnet J. 2011;17:10–2.
- 646 52. Edgar RC. UPARSE: highly accurate OTU sequences from microbial amplicon reads.  
647 Nat Methods. Nature Publishing Group; 2013;10:996–8.
- 648 53. Edgar RC, Haas BJ, Clemente JC, Quince C, Knight R. UCHIME improves sensitivity  
649 and speed of chimera detection. Bioinformatics. Oxford University Press; 2011;27:2194–200.
- 650 54. Andrews S. FastQC A Quality Control tool for High Throughput Sequence Data  
651 [Internet]. 2018.
- 652 55. Bushnell B, Rood J, Singer E. BBMerge – Accurate paired shotgun read merging via  
653 overlap. PLoS One. Public Library of Science; 2017;12:e0185056.
- 654 56. Nurk S, Meleshko D, Korobeynikov A, Pevzner PA. metaSPAdes: a new versatile  
655 metagenomic assembler. Genome Res. Cold Spring Harbor Laboratory Press; 2017;27:824–  
656 34.
- 657 57. Uritskiy G v., Diruggiero J, Taylor J. MetaWRAP - A flexible pipeline for genome-  
658 resolved metagenomic data analysis. Microbiome. BioMed Central Ltd.; 2018;6:1–13.
- 659 58. Parks DH, Imelfort M, Skennerton CT, Hugenholtz P, Tyson GW. CheckM: assessing the  
660 quality of microbial genomes recovered from isolates, single cells, and metagenomes.  
661 Genome Res. Cold Spring Harbor Laboratory Press; 2015;25:1043–55.
- 662 59. Oksanen J, Blanchet FG, Friendly M, Kindt R, Legendre P, Mcglinn D, et al. vegan:  
663 community ecology package. R package version 2.5-6 [Internet]. 2019.
- 664 60. Hernández M, Conrad R, Klose M, Ma K, Lu Y. Structure and function of methanogenic  
665 microbial communities in soils from flooded rice and upland soybean fields from Sanjiang  
666 plain, NE China. Soil Biol Biochem. Pergamon; 2017;105:81–91.
- 667 61. Legendre P, Gallagher ED. Ecologically meaningful transformations for ordination of  
668 species data. Oecologia. Springer; 2001;129:271–80.
- 669 62. Kolde R. pheatmap: Pretty Heatmaps. R package version 1.0.12. 2012.
- 670 63. Schloss PD, Westcott SL, Ryabin T, Hall JR, Hartmann M, Hollister EB, et al.  
671 Introducing mothur: Open-source, platform-independent, community-supported software for  
672 describing and comparing microbial communities. Appl Environ Microbiol. 2009;75:7537–  
673 41.
- 674 64. Islam T, Hernández M, Gessesse A, Colin Murrell J, Øvreås L. A novel moderately  
675 thermophilic facultative methylotroph within the class alphaproteobacteria. Microorganisms.  
676 MDPI AG; 2021;9:1–15.
- 677 65. Meier-Kolthoff JP, Göker M. TYGS is an automated high-throughput platform for state-  
678 of-the-art genome-based taxonomy. Nat Commun. Nature Publishing Group; 2019;10:1–10.
- 679 66. Rodriguez-R LM, Konstantinidis KT. The enveomics collection: a toolbox for specialized  
680 analyses of microbial genomes and metagenomes. PeerJ Inc.; 2016;
- 681 67. Alanjary M, Steinke K, Ziemert N. AutoMLST: an automated web server for generating  
682 multi-locus species trees highlighting natural product potential. Nucleic Acids Res. Oxford  
683 Academic; 2019;47:W276–82.
- 684 68. Florensa AF, Kaas RS, Clausen PTLC, Aytan-Aktug D, Aarestrup FM. ResFinder – an  
685 open online resource for identification of antimicrobial resistance genes in next-generation  
686 sequencing data and prediction of phenotypes from genotypes. Microb Genom. Microbiology  
687 Society; 2022;8:000748.
- 688
- 689
- 690
